# Supplementary material for: Genome-guided and mass spectrometry investigation of natural products produced by a potential new actinobacterial strain isolated from a mangrove ecosystem in Futian, Shenzhen, China
Source: PubMed Central journal article supplement (PMC6351551; doi:10.1038/s41598-018-37475-w), 2019-01-29
Supplement: 41598_2018_37475_MOESM1_ESM.pdf [file 41598_2018_37475_MOESM1_ESM.pdf]

## **Supplementary Information**

**Genome-guided and mass spectrometry investigation of natural products  
produced by a potential new actinobacterial strain isolated from a mangrove  
ecosystem in Futian, Shenzhen, China**

Hu Dini<sup>1</sup>; Gao Cheng<sup>2</sup>; Sun Chenghang<sup>3</sup>; Jin Tao<sup>4</sup>; Fan Guangyi<sup>4</sup>; Mok Kai Meng<sup>1</sup> and  
Lee Simon Ming-Yuen<sup>2</sup>

1 Faculty of Science and Technology, Department of Civil and Environmental  
Engineering, University of Macau, Macao, China;

2 State Key Laboratory of Quality Research in Chinese Medicine and institute of  
Chinese Medical Sciences, University of Macau, Macao, China;

3 Institute of Medicinal Biotechnology, Chinese Academy of Medical Science & Peking  
Union Medical College, Tiantanxili No 1, Beijing 100050, P.R. China;

4 Beijing Genome Institute–Shenzhen, Shenzhen 518083, China.

These authors contributed equally to this work

Correspondence and requests for materials should be addressed to S.M.L  
(simonlee@umac.mo)

## Supplementary Tables

Table S1. Isolated bacterial community from the soil samples based on the 16S rRNA sequences.

| Sample Types | Tree                   | Plates           | Top-hit taxon                      | Top-hit strain           | Similarity based on 16s (%) | Length (bp) |
|--------------|------------------------|------------------|------------------------------------|--------------------------|-----------------------------|-------------|
| Soil         | <i>Kandelia candel</i> | ISP2             | <i>Rhodococcus equi</i>            | NBRC 101255 <sup>T</sup> | 98.90                       | 1095        |
| Soil         | <i>Kandelia candel</i> | HL2              | <i>Rhodococcus equi</i>            | NBRC 101255 <sup>T</sup> | 99.21                       | 1015        |
| Soil         | <i>Kandelia candel</i> | ISP4             | <i>Microbacterium paraoxydans</i>  | NBRC 103076 <sup>T</sup> | 98.71                       | 850         |
| Soil         | <i>Kandelia candel</i> | HL2              | <i>Actinoallomurus acaciae</i>     | GMKU 931 <sup>T</sup>    | 98.74                       | 1112        |
| Soil         | <i>Kandelia candel</i> | ISP2             | <i>Stenotrophomonas panacihumi</i> | JCM 16536 <sup>T</sup>   | 99.53                       | 850         |
| Soil         | <i>Kandelia candel</i> | ISP4             | <i>Bacillus cibi</i>               | DSM 16189 <sup>T</sup>   | 97.30                       | 1050        |
| Soil         | <i>Kandelia candel</i> | ISP4             | <i>Bacillus vietnamensis</i>       | 15-1 <sup>T</sup>        | 98.62                       | 1017        |
| Soil         | <i>Kandelia candel</i> | Gause<br>No.1    | <i>Micromonospora aurantiaca</i>   | ATCC 27029 <sup>T</sup>  | 99.76                       | 850         |
| Soil         | <i>Kandelia candel</i> | Nutrient<br>agar | <i>Micromonospora aurantiaca</i>   | ATCC 27029 <sup>T</sup>  | 99.76                       | 850         |
| Soil         | <i>Kandelia candel</i> | HL2              | <i>Actinoallomurus acaciae</i>     | GMKU 931 <sup>T</sup>    | 98.74                       | 1112        |
| Soil         | <i>Kandelia candel</i> | ISP4             | <i>Bacillus aryabhatai</i>         | B8W22 <sup>T</sup>       | 99.35                       | 930         |
| Soil         | <i>Kandelia candel</i> | Czapek           | <i>Paenibacillus nebraskensis</i>  | JJ-59 <sup>T</sup>       | 98.81                       | 930         |
| Soil         | <i>Kandelia candel</i> | HL2              | <i>Bacillus aryabhatai</i>         | B8W22 <sup>T</sup>       | 99.25                       | 930         |

---

|       |                        |               |                                          |                              |        |      |
|-------|------------------------|---------------|------------------------------------------|------------------------------|--------|------|
| Soil  | <i>Kandelia candel</i> | ISP4          | <i>Bacillus vietnamensis</i>             | 15-1 <sup>T</sup>            | 97.83  | 881  |
| Soil  | <i>Kandelia candel</i> | ISP4          | <i>Bacillus vietnamensis</i>             | 15-1 <sup>T</sup>            | 98.58  | 850  |
| Soil  | <i>Kandelia candel</i> | Gause<br>No.1 | <i>Paenibacillus alginolyticus</i>       | DSM 5050 <sup>T</sup>        | 98.45  | 1109 |
| Soil  | <i>Kandelia candel</i> | ISP2          | <i>Bacillus drentensis</i>               | LMG 21831 <sup>T</sup>       | 100.00 | 1046 |
| Soil  | <i>Kandelia candel</i> | Czapek        | <i>Bacillus drentensis</i>               | LMG 21831 <sup>T</sup>       | 100.00 | 930  |
| Soil  | <i>Kandelia candel</i> | ISP4          | <i>Adhaeribacter terreus</i>             | DNG6 <sup>T</sup>            | 97.20  | 930  |
| Soil  | <i>Aegiceras</i>       | ISP2          | <i>Streptomyces libani subsp. libani</i> | NBRC 13452 <sup>T</sup>      | 99.09  | 1121 |
|       | <i>corniculatum</i>    |               |                                          |                              |        |      |
| Soil  | <i>Aegiceras</i>       | HL2           | <i>Streptomyces glauciniger</i>          | CGMCC<br>4.1858 <sup>T</sup> | 99.34  | 1069 |
|       | <i>corniculatum</i>    |               |                                          |                              |        |      |
| Soil  | <i>Aegiceras</i>       | HL2           | <i>Rhodococcus globerulus</i>            | NBRC 14531 <sup>T</sup>      | 99.19  | 1110 |
|       | <i>corniculatum</i>    |               |                                          |                              |        |      |
| soil  | <i>Aegiceras</i>       | ISP4          | <i>Micromonospora equina</i>             | Y22 <sup>T</sup>             | 99.15  | 850  |
|       | <i>corniculatum</i>    |               |                                          |                              |        |      |
| Soil  | <i>Aegiceras</i>       | Gause<br>No.1 | <i>Mycobacterium conceptionense</i>      | CCUG 50187 <sup>T</sup>      | 98.82  | 930  |
|       | <i>corniculatum</i>    |               |                                          |                              |        |      |
| Soil  | <i>Aegiceras</i>       | ISP4          | <i>Mycobacterium moriokaense</i>         | CIP 105393 <sup>T</sup>      | 97.00  | 1041 |
|       | <i>corniculatum</i>    |               |                                          |                              |        |      |
| Soil  | <i>Aegiceras</i>       | HL2           | <i>Rhodococcus maanshanensis</i>         | DSM 44675 <sup>T</sup>       | 99.35  | 1078 |
|       | <i>corniculatum</i>    |               |                                          |                              |        |      |
| Plant | <i>Aegiceras</i>       | HL2           | <i>Serratia nematodiphila</i>            | DSM 21420 <sup>T</sup>       | 99.06  | 850  |

---

---

|       |                     |          |                                   |                       |       |      |
|-------|---------------------|----------|-----------------------------------|-----------------------|-------|------|
|       | <i>corniculatum</i> |          |                                   |                       |       |      |
| Plant | <i>Aegiceras</i>    | Nutrient | <i>Pseudomonas paralactis</i>     | WS4992 <sup>T</sup>   | 99.65 | 850  |
|       | <i>corniculatum</i> | agar     |                                   |                       |       |      |
| Soil  | <i>Aegiceras</i>    | Nutrient | <i>Bacillus pacificus</i>         | EB422 <sup>T</sup>    | 99.18 | 850  |
|       | <i>corniculatum</i> | agar     |                                   |                       |       |      |
| Plant | <i>Aegiceras</i>    | ISP2     | <i>Pseudomonas simiae</i>         | OLi <sup>T</sup>      | 99.63 | 850  |
|       | <i>corniculatum</i> |          |                                   |                       |       |      |
| Soil  | <i>Aegiceras</i>    | ISP4     | <i>Paenibacillus xylanexedens</i> | B22a <sup>T</sup>     | 99.03 | 930  |
|       | <i>corniculatum</i> |          |                                   |                       |       |      |
| Soil  | <i>Aegiceras</i>    | ISP4     | <i>Paenibacillus nebraskensis</i> | JJ-59 <sup>T</sup>    | 98.35 | 850  |
|       | <i>corniculatum</i> |          |                                   |                       |       |      |
| Soil  | <i>Aegiceras</i>    | ISP2     | <i>Massilia aerilata</i>          | 5516S-11 <sup>T</sup> | 99.76 | 850  |
|       | <i>corniculatum</i> |          |                                   |                       |       |      |
| Soil  | <i>Aegiceras</i>    | ISP4     | <i>Massilia arvi</i>              | THG-RS2O <sup>T</sup> | 98.62 | 1026 |
|       | <i>corniculatum</i> |          |                                   |                       |       |      |
| Soil  | <i>Aegiceras</i>    | ISP4     | <i>Massilia aerilata</i>          | 5516S-11 <sup>T</sup> | 98.62 | 1109 |
|       | <i>corniculatum</i> |          |                                   |                       |       |      |
| Soil  | <i>Aegiceras</i>    | ISP4     | <i>Bacillus vietnamensis</i>      | 15-1 <sup>T</sup>     | 98.53 | 1101 |
|       | <i>corniculatum</i> |          |                                   |                       |       |      |
| Soil  | <i>Aegiceras</i>    | ISP4     | <i>Bacillus vietnamensis</i>      | 15-1 <sup>T</sup>     | 98.90 | 1008 |
|       | <i>corniculatum</i> |          |                                   |                       |       |      |
| Soil  | <i>Aegiceras</i>    | ISP4     | <i>Bacillus hwajinpoensis</i>     | SW-72 <sup>T</sup>    | 98.14 | 913  |

---

---

|      |                     |      |                          |                       |       |     |
|------|---------------------|------|--------------------------|-----------------------|-------|-----|
|      | <i>corniculatum</i> |      |                          |                       |       |     |
| Soil | <i>Aegiceras</i>    | ISP4 | <i>Massilia aerilata</i> | 5516S-11 <sup>T</sup> | 99.78 | 929 |
|      | <i>corniculatum</i> |      |                          |                       |       |     |

---

Table S2. Overview of 105 secondary metabolites of biosynthetic gene clusters involved in the production of secondary metabolites of *Mycobacterium* sp.13, detected by anti-SMASH.

---

| Cluster    | Type       | From   | To     | Most similar known cluster                                                 |
|------------|------------|--------|--------|----------------------------------------------------------------------------|
| Cluster 1  | Putative   | 39394  | 49846  |                                                                            |
| Cluster 2  | Putative   | 67672  | 86246  |                                                                            |
| Cluster 3  | Putative   | 217855 | 248773 |                                                                            |
| Cluster 4  | Putative   | 257445 | 293886 |                                                                            |
| Cluster 5  | T1pks-Nrps | 305280 | 363883 | Glycopeptidolipid biosynthetic gene cluster (26% of genes show similarity) |
| Cluster 6  | Putative   | 379975 | 391567 |                                                                            |
| Cluster 7  | Putative   | 399485 | 407373 |                                                                            |
| Cluster 8  | Putative   | 425304 | 438184 |                                                                            |
| Cluster 9  | Fatty acid | 1      | 19122  | U-68204 biosynthetic gene cluster (14% of genes show similarity)           |
| Cluster 10 | Putative   | 22537  | 41268  |                                                                            |

---

---

|            |            |        |        |                                                                        |
|------------|------------|--------|--------|------------------------------------------------------------------------|
| Cluster 11 | Putative   | 217781 | 224843 | K-252a biosynthetic gene cluster (8% of genes show similarity)         |
| Cluster 12 | Putative   | 246515 | 251955 |                                                                        |
| Cluster 13 | Putative   | 287230 | 299920 | Herboxidiene biosynthetic gene cluster (3% of genes show similarity)   |
| Cluster 14 | Putative   | 46371  | 64801  |                                                                        |
| Cluster 15 | Putative   | 68410  | 101680 |                                                                        |
| Cluster 16 | Fatty acid | 107115 | 161017 | Polyoxypeptin biosynthetic gene cluster (10% of genes show similarity) |
| Cluster 17 | Putative   | 172942 | 192204 |                                                                        |
| Cluster 18 | Putative   | 198197 | 209562 |                                                                        |
| Cluster 19 | Putative   | 216774 | 232690 |                                                                        |
| Cluster 20 | Putative   | 236839 | 256018 | Meridamycin biosynthetic gene cluster (4% of genes show similarity)    |
| Cluster 21 | Putative   | 325438 | 335682 |                                                                        |
| Cluster 22 | Putative   | 349085 | 381455 |                                                                        |
| Cluster 23 | Putative   | 404398 | 410344 |                                                                        |
| Cluster 24 | Putative   | 415521 | 419199 |                                                                        |
| Cluster 25 | T1pks      | 1      | 39994  | Asukamycin biosynthetic gene cluster (4% of genes show similarity)     |
| Cluster 26 | Putative   | 100915 | 109108 |                                                                        |
| Cluster 27 | Putative   | 112840 | 139772 |                                                                        |

---

---

|            |                         |        |        |                                                                         |
|------------|-------------------------|--------|--------|-------------------------------------------------------------------------|
| Cluster 28 | Putative                | 143411 | 169684 | Esmeraldin biosynthetic gene cluster (8% of genes show similarity)      |
| Cluster 29 | Putative                | 295656 | 304740 |                                                                         |
| Cluster 30 | Putative                | 355259 | 367549 |                                                                         |
| Cluster 31 | Putative                | 371405 | 382998 |                                                                         |
| Cluster 32 | Saccharide              | 14476  | 84084  |                                                                         |
| Cluster 33 | Nrps                    | 124058 | 201141 |                                                                         |
| Cluster 34 | Putative                | 208951 | 224388 |                                                                         |
| Cluster 35 | Bacteriocin             | 239802 | 250599 |                                                                         |
| Cluster 36 | Putative                | 276430 | 290005 |                                                                         |
| Cluster 37 | T1pks-<br>Butyrolactone | 308529 | 360681 |                                                                         |
| Cluster 38 | Putative                | 361004 | 376556 |                                                                         |
| Cluster 39 | Putative                | 433402 | 459003 | Apramycin biosynthetic gene cluster (6% of genes show similarity)       |
| Cluster 40 | Fatty acid              | 27828  | 57082  |                                                                         |
| Cluster 41 | Putative                | 64484  | 79079  |                                                                         |
| Cluster 42 | Other                   | 99921  | 150222 |                                                                         |
| Cluster 43 | Putative                | 156713 | 171921 |                                                                         |
| Cluster 44 | Putative                | 182329 | 191718 |                                                                         |
| Cluster 45 | Putative                | 197498 | 221319 | Thiotetroamide biosynthetic gene cluster (11% of genes show similarity) |

---

---

|            |                  |        |        |                                                                            |
|------------|------------------|--------|--------|----------------------------------------------------------------------------|
| Cluster 46 | Putative         | 227400 | 237745 | Arsenopolyketides biosynthetic gene cluster (8% of genes show similarity)  |
| Cluster 47 | Putative         | 246369 | 276738 |                                                                            |
| Cluster 48 | Ectoine          | 13174  | 35327  | Ectoine biosynthetic gene cluster (66% of genes show similarity)           |
| Cluster 49 | Putative         | 59535  | 68162  |                                                                            |
| Cluster 50 | Fatty acid       | 155924 | 184664 |                                                                            |
| Cluster 51 | Putative         | 211428 | 255052 | Phosphonoglycans biosynthetic gene cluster (3% of genes show similarity)   |
| Cluster 52 | Putative         | 255843 | 270767 |                                                                            |
| Cluster 53 | Saccharide       | 53640  | 77204  |                                                                            |
| Cluster 54 | Putative         | 173613 | 195787 | Azinomycin B biosynthetic gene cluster (4% of genes show similarity)       |
| Cluster 55 | T1pks-Resorcinol | 19660  | 64983  | Sch47554/Sch47555 biosynthetic gene cluster (7% of genes show similarity)  |
| Cluster 56 | Saccharide       | 111916 | 163252 |                                                                            |
| Cluster 57 | Putative         | 174835 | 181850 |                                                                            |
| Cluster 58 | Putative         | 203111 | 212631 |                                                                            |
| Cluster 59 | Nrps             | 227646 | 252490 | Glycopeptidolipid biosynthetic gene cluster (10% of genes show similarity) |
| Cluster 60 | Terpene          | 1      | 14976  | Isorenieratene biosynthetic gene cluster (71% of genes show similarity)    |

---



---

|            |                         |        |        |                                                                          |
|------------|-------------------------|--------|--------|--------------------------------------------------------------------------|
| Cluster 61 | T1pks-<br>Cf_saccharide | 56964  | 142329 |                                                                          |
| Cluster 62 | Putative                | 158416 | 169340 |                                                                          |
| Cluster 63 | Putative                | 42795  | 53643  | Phosphonoglycans biosynthetic gene cluster (3% of genes show similarity) |
| Cluster 64 | Putative                | 71294  | 96798  |                                                                          |
| Cluster 65 | Putative                | 125763 | 140161 |                                                                          |
| Cluster 66 | Putative                | 211311 | 223095 |                                                                          |
| Cluster 67 | Putative                | 49821  | 65311  |                                                                          |
| Cluster 68 | Putative                | 307167 | 325198 | Mycolic acid biosynthetic gene cluster (100% of genes show similarity)   |
| Cluster 69 | Putative                | 330168 | 358312 | Nosiheptide biosynthetic gene cluster (15% of genes show similarity)     |
| Cluster 70 | Putative                | 29273  | 40298  |                                                                          |
| Cluster 71 | T1pks                   | 1      | 24838  | Maklamicin biosynthetic gene cluster (4% of genes show similarity)       |
| Cluster 72 | Putative                | 71951  | 79923  |                                                                          |
| Cluster 73 | Fatty acid              | 123156 | 144190 |                                                                          |
| Cluster 74 | Putative                | 2      | 23058  |                                                                          |
| Cluster 75 | Putative                | 85169  | 102685 |                                                                          |
| Cluster 76 | Saccharide              | 114790 | 151099 |                                                                          |
| Cluster 77 | Putative                | 51024  | 57531  |                                                                          |

---

---

|            |                 |        |        |                                                                            |
|------------|-----------------|--------|--------|----------------------------------------------------------------------------|
| Cluster 78 | Putative        | 82124  | 99304  |                                                                            |
| Cluster 79 | Putative        | 122692 | 138301 |                                                                            |
| Cluster 80 | Putative        | 8757   | 15796  |                                                                            |
| Cluster 81 | Fatty acid      | 33337  | 63071  | Caprazamycin biosynthetic gene cluster (28% of genes show similarity)      |
| Cluster 82 | Putative        | 163575 | 184285 |                                                                            |
| Cluster 83 | Saccharide-Nrps | 200195 | 248739 | Glycopeptidolipid biosynthetic gene cluster (94% of genes show similarity) |
| Cluster 84 | Putative        | 76531  | 94223  |                                                                            |
| Cluster 85 | Other           | 30828  | 74760  | Phosphonoglycans biosynthetic gene cluster (3% of genes show similarity)   |
| Cluster 86 | Putative        | 99499  | 114234 |                                                                            |
| Cluster 87 | Putative        | 69258  | 84563  |                                                                            |
| Cluster 88 | Putative        | 52702  | 62049  |                                                                            |
| Cluster 89 | Putative        | 10356  | 16403  |                                                                            |
| Cluster 90 | Putative        | 89542  | 100338 |                                                                            |
| Cluster 91 | Putative        | 3159   | 31340  |                                                                            |
| Cluster 92 | Putative        | 35054  | 45961  |                                                                            |
| Cluster 93 | Putative        | 93272  | 97140  |                                                                            |
| Cluster 94 | Putative        | 85108  | 97668  |                                                                            |
| Cluster 95 | Other           | 32260  | 74755  |                                                                            |
| Cluster 96 | Putative        | 1346   | 5995   |                                                                            |

---

---

|             |          |       |       |                                                                              |
|-------------|----------|-------|-------|------------------------------------------------------------------------------|
| Cluster 97  | Putative | 42243 | 58811 |                                                                              |
| Cluster 98  | Putative | 590   | 5094  |                                                                              |
| Cluster 99  | Putative | 7013  | 14333 |                                                                              |
| Cluster 100 | Putative | 25954 | 46597 |                                                                              |
| Cluster 101 | Putative | 30187 | 42542 |                                                                              |
| Cluster 102 | Putative | 5795  | 15419 |                                                                              |
| Cluster 103 | Putative | 15210 | 26047 |                                                                              |
| Cluster 104 | Other    | 1     | 17459 |                                                                              |
| Cluster 105 | Nrps     | 1     | 7827  | Glycopeptidolipid biosynthetic gene cluster (7% of<br>genes show similarity) |

---

## Supplementary Figures

Most similar known cluster: Maklamicin biosynthetic gene cluster

Cluster type: T1pks

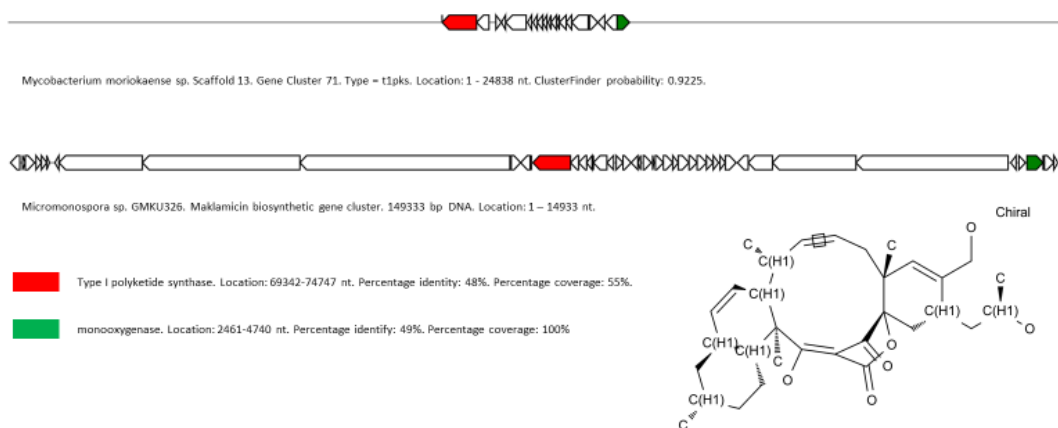

Figure S1. Proposed biosynthetic gene cluster of maklamicin-like compound in *Mycobacterium* sp.13. The most similar gene cluster from *Micromonospora* sp. GMKU326 is shown, with related genes drawn in the same color to highlight inter-cluster rearrangements. The detailed structure of the predicted compound is also displayed.

Most similar known cluster: Sch47554/Sch47555 biosynthetic gene cluster

Cluster type: T1pks-Resorcinol

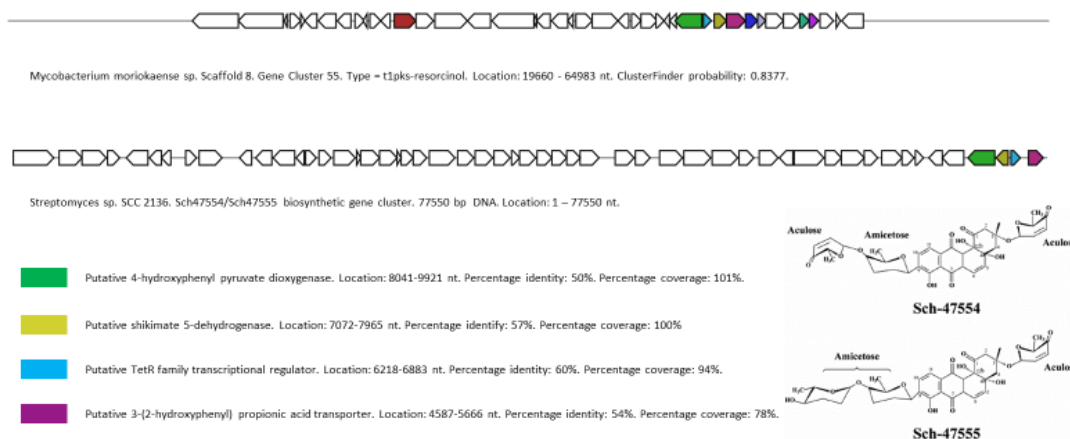

Figure S2. Proposed biosynthetic gene cluster of sch47554/sch47555-like compound in *Mycobacterium* sp.13. The most similar gene cluster from *Streptomyces* sp. SCC 2136 is shown, with related genes drawn in the same color to highlight inter-cluster rearrangements. The detailed structure of the predicted compound is also displayed.

Most similar known cluster: Caprazamycin biosynthetic gene cluster

Cluster type: Fatty acid

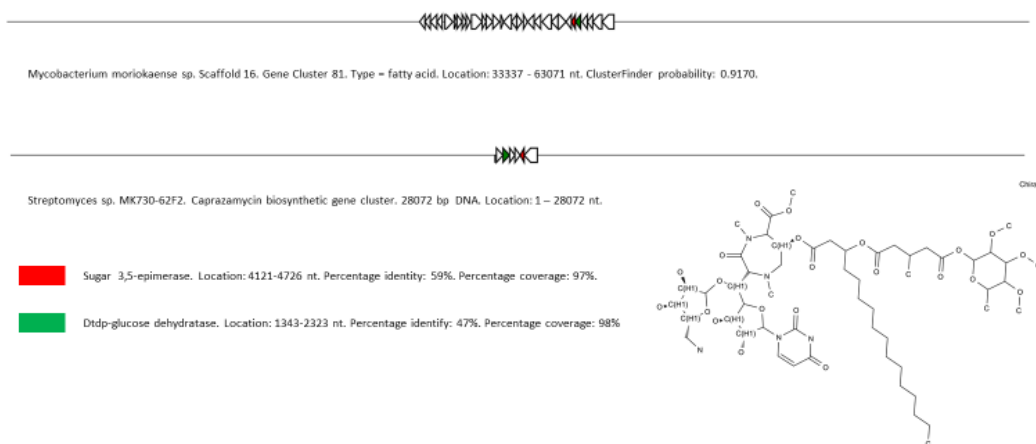

Figure S3. Proposed biosynthetic gene cluster of caprazamycin-like compound in *Mycobacterium* sp.13. The most similar gene cluster from *Streptomyces* sp. MK730-62F2 is shown, with related genes drawn in the same color to highlight inter-cluster rearrangements. The detailed structure of the predicted compound is also displayed.

Most similar known cluster: U-68204 biosynthetic gene cluster

Cluster type: Fatty acid

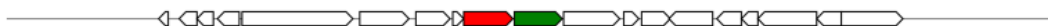

*Mycobacterium moriokaense* sp. Scaffold 1. Gene Cluster 9. Type = fatty acid. Location: 1 - 19122 nt. ClusterFinder probability: 0.9345.

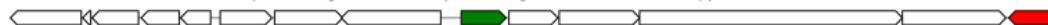

*Streptomyces* sp. MG11. U-68204 biosynthetic gene cluster. 27100 bp DNA. Location: 1 - 27100 nt.

 3-oxoacyl-ACP synthase. Location: 25855-27069 nt. Percentage identity: 46%. Percentage coverage: 97%.

 3-oxoacyl-ACP synthase. Location: 11712-12866 nt. Percentage identity: 46%. Percentage coverage: 92%

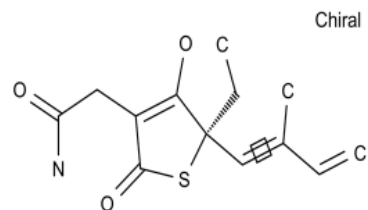

Figure S4. Proposed biosynthetic gene cluster of u-68204-like compound in *Mycobacterium* sp.13. The most similar gene cluster from *Streptomyces* sp. MG11 is shown, with related genes drawn in the same color to highlight inter-cluster rearrangements. The detailed structure of the predicted compound is also displayed.

Most similar known cluster: Nosiheptide biosynthetic gene cluster

Cluster type: Putative

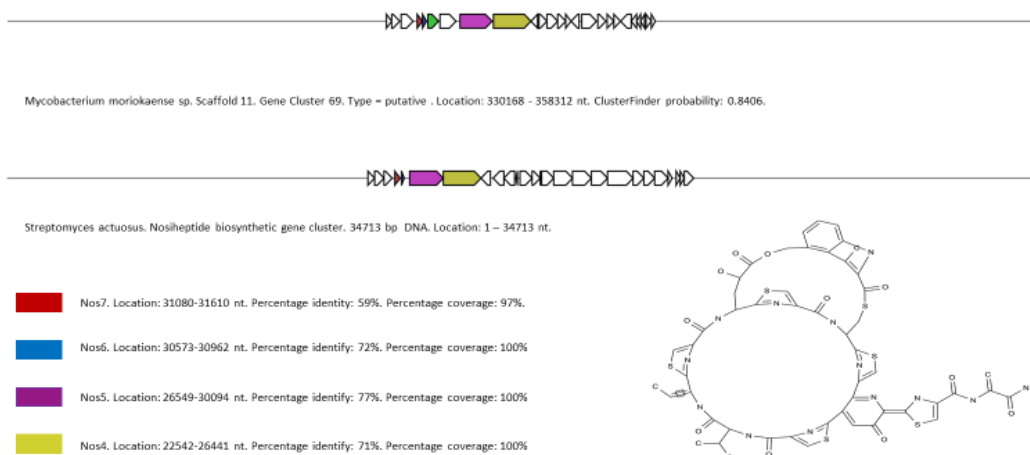

Figure S5. Proposed biosynthetic gene cluster of nosiheptide-like compound in *Mycobacterium* sp.13. The most similar gene cluster from *Streptomyces actuosus* is shown, with related genes drawn in the same color to highlight inter-cluster rearrangements. The detailed structure of the predicted compound is also displayed.



Most similar known cluster: Apramycin biosynthetic gene cluster

Cluster type: Putative

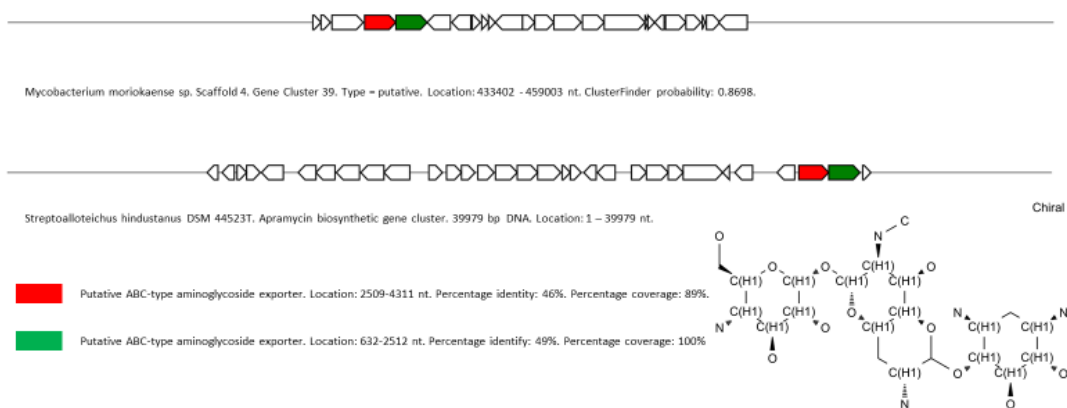

Figure S6. Proposed biosynthetic gene cluster of apramycin-like compound in *Mycobacterium* sp.13. The most similar gene cluster from *Streptoalloteichus hindustanus* DSM 44523<sup>T</sup> is shown, with related genes drawn in the same color to highlight inter-cluster rearrangements. The detailed structure of the predicted compound is also displayed.

Most similar known cluster: Azinomycin B biosynthetic gene cluster

Cluster type: Putative

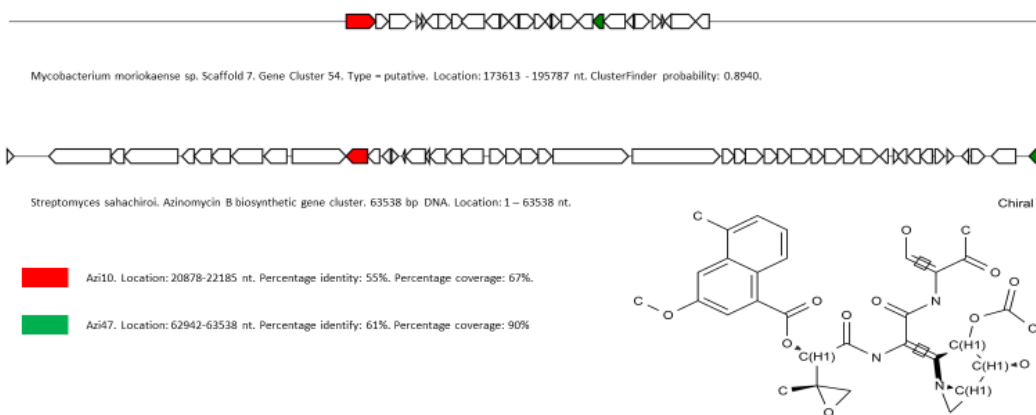

Figure S7. Proposed biosynthetic gene cluster of azinomycin B-like compound in *Mycobacterium* sp.13. The most similar gene cluster from *Streptomyces sahachiroi* is shown, with related genes drawn in the same color to highlight inter-cluster rearrangements. The detailed structure of the predicted compound is also displayed.
